# Supplementary material for: Production of bio-fuels and chemicals by microwave-assisted, catalytic, hydrothermal liquefaction (MAC-HTL) of a mixture of pine and spruce biomass
Source: Royal Society of Chemistry journal article supplement (doi:10.1039/c8gc03244k), 2018-12-03
Supplement: c8gc03244k1.pdf [file c8gc03244k1.pdf]

# **Production of bio- fuels and chemicals by Microwave-Assisted, Catalytic, Hydrothermal Liquefaction (MAC-HTL) of a mixture of pine and spruce biomass**

Javier Remón\*, James Randall, Vitaliy L. Budarin, James H. Clark\*

---

*Green Chemistry Centre of Excellence, University of York, Department of Chemistry, Heslington, York, YO10 5DD, UK.*

*\* Corresponding authors: J. Remón (javier.remonnunez@york.ac.uk) and J.H.Clark (james.clark@york.ac.uk)*

## **SUPPLEMENTARY INFORMATION**

**Table S1.** Bio-oil chemical composition

**Table S2.** Relative influence of the operating conditions on the experimental results





**Table S2.** Relative influence of the operating conditions on the experimental results

|                    | R <sup>2</sup> | Indep. | T             | P            | t             | W              | TP            | Tt           | TW           | Pt           | PW           | tW            | T <sup>2</sup> | P <sup>2</sup> | t <sup>2</sup> | W <sup>2</sup> | TPt          | TPW           | TtW          | PtW           | T <sup>2</sup> P | T <sup>2</sup> t | T <sup>2</sup> W | TP <sup>2</sup> | T <sup>2</sup> P <sup>2</sup> | TPtW          |
|--------------------|----------------|--------|---------------|--------------|---------------|----------------|---------------|--------------|--------------|--------------|--------------|---------------|----------------|----------------|----------------|----------------|--------------|---------------|--------------|---------------|------------------|------------------|------------------|-----------------|-------------------------------|---------------|
| Conversion (%)     | 0.95           | 43.72  | 17.84<br>(43) | n.s.         | n.s.          | n.s.           | n.s.          | 4.26<br>(10) | n.s.         | n.s.         | n.s.         | n.s.          | n.s.           | n.s.           | -12.61<br>(12) | 6.71<br>(7)    | n.s.         | n.s.          | 2.27<br>(5)  | n.s.          | n.s.             | 10.31<br>(23)    | n.s.             | n.s.            | n.s.                          | n.s.          |
| Gas yield (%)      | 0.97           | 33.62  | 11.98<br>(25) | -1.77<br>(4) | -7.32<br>(13) | 11.68<br>(5)   | -2.76<br>(5)  | 1.81<br>(4)  | -1.69<br>(4) | -2.51<br>(5) | n.s.         | n.s.          | 3.54<br>(1)    | n.s.           | -10.52<br>(8)  | 4<br>(3)       | -2.21<br>(4) | n.s.          | n.s.         | n.s.          | 15.44<br>(10)    | -15.64<br>(10)   | n.s.             | n.s.            | n.s.                          |               |
| Bio-oil yield (%)  | 0.96           | 10.14  | 9.32<br>(20)  | n.s.         | 5.97<br>(9)   | n.s.           | 2.61<br>(8)   | 2.45<br>(8)  | 2.42<br>(8)  | 1.35<br>(4)  | n.s.         | n.s.          | n.s.           | n.s.           | -2.86<br>(6)   | n.s.           | n.s.         | n.s.          | 1.17<br>(4)  | -1.08<br>(4)  | 1.86<br>(6)      | -3.78<br>(4)     | 2.87<br>(9)      | -3.88<br>(4)    | n.s.                          | -1.58<br>(5)  |
| C (wt.%)           | 0.98           | 53.32  | n.s.          | 2.82<br>(5)  | -10.38<br>(1) | n.s.           | -6.92<br>(12) | n.s.         | 2.02<br>(4)  | -2.74<br>(5) | 5.23<br>(9)  | 3.93<br>(7)   | n.s.           | -8.24<br>(4)   | 6.37<br>(5)    | n.s.           | 3.68<br>(7)  | -7.05<br>(13) | -2.62<br>(5) | n.s.          | n.s.             | 11.71<br>(7)     | 11.71<br>(12)    | n.s.            | n.s.                          | 2.8<br>(5)    |
| H (wt.%)           | 0.99           | 5.62   | -1.07<br>(21) | 0.45<br>(8)  | n.s.          | 0.28<br>(5)    | 0.18<br>(3)   | 0.38<br>(7)  | -0.36<br>(7) | -0.39<br>(4) | 0.22<br>(7)  | n.s.          | 1.44<br>(15)   | -0.81<br>(5)   | n.s.           | n.s.           | n.s.         | 0.18<br>(3)   | 0.14<br>(2)  | 0.21<br>(4)   | -0.99<br>(6)     | n.s.             | n.s.             | n.s.            | 0.5<br>(2)                    |               |
| O (wt.%)           | 0.98           | 41.11  | n.s.          | -2.39<br>(5) | 10.3<br>(1)   | n.s.           | 6.74<br>(13)  | n.s.         | -1.66<br>(3) | 2.52<br>(5)  | -4.83<br>(9) | -3.96<br>(7)  | n.s.           | 8.07<br>(4)    | -7.26<br>(6)   | n.s.           | -3.61<br>(7) | 6.87<br>(13)  | 2.49<br>(5)  | n.s.          | n.s.             | -11.61<br>(7)    | -11.61<br>(12)   | n.s.            | n.s.                          | -2.8<br>(5)   |
| HHV (MJ/kg)        | 0.94           | 22.07  | -1.03<br>(5)  | n.s.         | -4.6<br>(1)   | n.s.           | -2.9<br>(13)  | n.s.         | n.s.         | -0.96<br>(4) | 1.86<br>(8)  | 1.83<br>(8)   | n.s.           | -6.08<br>(3)   | n.s.           | n.s.           | 1.58<br>(7)  | -2.96<br>(13) | -1.01<br>(5) | n.s.          | n.s.             | 5.17<br>(8)      | 5.17<br>(12)     | n.s.            | 5.63<br>(8)                   | 1.27<br>(6)   |
| Aldehydes (Area %) | 0.99           | 28.67  | 6.84<br>(9)   | n.s.         | 7.66<br>(5)   | -24.94<br>(13) | 2.62<br>(3)   | -9.1<br>(11) | -1.58<br>(2) | -1.81<br>(2) | n.s.         | -1.8<br>(2)   | -19.08<br>(9)  | 9.67<br>(5)    | -15.29<br>(5)  | 15.9<br>(7)    | 1.69<br>(2)  | -2.58<br>(3)  | 3.66<br>(4)  | 1.74<br>(2)   | n.s.             | -12.78<br>(5)    | 16.11<br>(6)     | n.s.            | n.s.                          | -2.11<br>(3)  |
| Furans (Area %)    | 1              | 0      | -2.72<br>(16) | n.s.         | n.s.          | n.s.           | 0.02<br>(1)   | 3.65<br>(16) | -0.66<br>(3) | -0.43<br>(2) | 0.16<br>(1)  | -1.1<br>(5)   | 2.72<br>(12)   | n.s.           | n.s.           | n.s.           | -0.43<br>(2) | 0.16<br>(1)   | -1.1<br>(5)  | -0.29<br>(1)  | 0.02<br>(1)      | 3.65<br>(17)     | -0.66<br>(3)     | 6.82<br>(11)    | 1.38<br>(2)                   | -0.29<br>(1)  |
| Esters (Area %)    | 0.83           | 9.93   | -3.35<br>(14) | -9.61<br>(7) | n.s.          | n.s.           | n.s.          | -1.96<br>(8) | n.s.         | n.s.         | n.s.         | 3.12<br>(12)  | n.s.           | 8.03<br>(9)    | n.s.           | -6.55<br>(12)  | n.s.         | n.s.          | n.s.         | -4.09<br>(16) | 8.99<br>(12)     | n.s.             | n.s.             | n.s.            | n.s.                          | 3.15<br>(12)  |
| Ketones (Area %)   | 0.95           | 7.36   | 5.67<br>(21)  | n.s.         | 3.92<br>(14)  | n.s.           | n.s.          | 5.37<br>(19) | -2.59<br>(9) | 1.35<br>(5)  | n.s.         | -3.88<br>(13) | 2.31<br>(5)    | n.s.           | n.s.           | n.s.           | n.s.         | -1.47<br>(5)  | -1.39<br>(5) | 1.1<br>(4)    | n.s.             | n.s.             | n.s.             | n.s.            | n.s.                          |               |
| Alcohols (Area %)  | 0.93           | 3.44   | 1.91<br>(13)  | n.s.         | 2.14<br>(15)  | n.s.           | n.s.          | 2.69<br>(18) | 1.32<br>(9)  |              | 0.75<br>(5)  | 1.04<br>(7)   | n.s.           | -3.44<br>(3)   | n.s.           | n.s.           | -0.67<br>(4) | n.s.          | 0.93<br>(6)  | n.s.          | n.s.             | n.s.             | 0.86<br>(6)      | n.s.            | 2.97<br>(7)                   | 1.03<br>(7)   |
| Phenols (Area %)   | 0.99           | 18.11  | -27.8<br>(16) | 5.0<br>(5)   | -31.77<br>(5) | 15.01<br>(10)  | -4.45<br>(5)  | -2.55<br>(3) | 2.6<br>(3)   | 3.8<br>(4)   | -3.08<br>(3) | n.s.          | 27.61<br>(2)   | n.s.           | 32.95<br>(2)   | n.s.           | -2.45<br>(2) | 3.17<br>(3)   | -3.17<br>(3) | n.s.          | n.s.             | 30.68<br>(10)    | -6.51<br>(2)     | 14.54<br>(5)    | -53.31<br>(12)                | 3.57<br>(4)   |
| Acids (Area %)     | 0.99           | 1.14   | 8.71<br>(4)   | n.s.         | 1.18<br>(3)   | 13.44<br>(7)   | 5.35<br>(14)  | -1.76<br>(5) | 1.93<br>(5)  | -1.73<br>(5) | 1.56<br>(4)  | n.s.          | 9.88<br>(5)    | n.s.           | n.s.           | 12.3<br>(4)    | 0.95<br>(3)  | 1.02<br>(3)   | -0.82<br>(2) | -1.57<br>(4)  | 0.88<br>(2)      | n.s.             | -12.45<br>(11)   | -8.23<br>(7)    | -17.21<br>(11)                | n.s.          |
| Cyclics (Area %)   | 0.92           | 1.72   | n.s.          | -1.43<br>(4) | -3.56<br>(11) | n.s.           | n.s.          | 3.75<br>(11) | 1.85<br>(6)  | n.s.         | n.s.         | 1.82<br>(5)   | 4.55<br>(12)   | 3.35<br>(4)    | n.s.           | n.s.           | 2.99<br>(9)  | 2.11<br>(6)   | n.s.         | 2.08<br>(6)   | -4.67<br>(13)    | n.s.             | n.s.             | n.s.            | n.s.                          | -4.36<br>(12) |

Response = Indep. + Coefficient T·T + Coefficient P·P + Coefficient C·C + Coefficient W·W + Coefficient TC·T·C + Coefficient TW·T·W + Coefficient PC·P·C + Coefficient PW·P·W + Coefficient CW·C·W + Coefficient T<sup>2</sup>·T<sup>2</sup> + Coefficient P<sup>2</sup>·P<sup>2</sup> + Coefficient C<sup>2</sup>·C<sup>2</sup> + Coefficient W<sup>2</sup>·W<sup>2</sup> + Coefficient TPC·T·P·C + Coefficient TPW·T·P·W + Coefficient TCW·T·C·W + Coefficient PCW·P·C·W + Coefficient T<sup>2</sup>P·T<sup>2</sup>·P + Coefficient T<sup>2</sup>W·T<sup>2</sup>·W + Coefficient TP<sup>2</sup>·T·P<sup>2</sup> + Coefficient TPTW·T·P·t·W n.s.: Non significant with 95% confidence. T = temperature, P = pressure, t = time, W = catalyst/biomass ratio.
